# Supplementary material for: Kraft lignin depolymerization by the Fenton process assisted by hydrodynamic cavitation
Source: Royal Society of Chemistry journal article supplement (doi:10.1039/d5se00436e), 2025-01-01
Supplement: d5se00436e1.pdf [file d5se00436e1.pdf]

**Supplementary information for:**

**Lignin depolymerization by Fenton process assisted by hydrodynamic cavitation**

**Lucas Ramos<sup>1</sup>, Giovani Maltempi-Mendes<sup>1</sup>, Julio C. Santos<sup>2</sup>, Anuj Kumar Chandel<sup>1\*</sup>**

1 Renewable Carbon and Biology Systems Laboratory, Department of Biotechnology, Engineering School of Lorena, University of São Paulo (EEL-USP), Lorena 12602-810, SP, Brazil

2 Department of Biotechnology, Engineering School of Lorena, University of São Paulo (EEL-USP), Lorena 12602-810, SP, Brazil

\* Correspondence: [anuj10@usp.br](mailto:anuj10@usp.br).

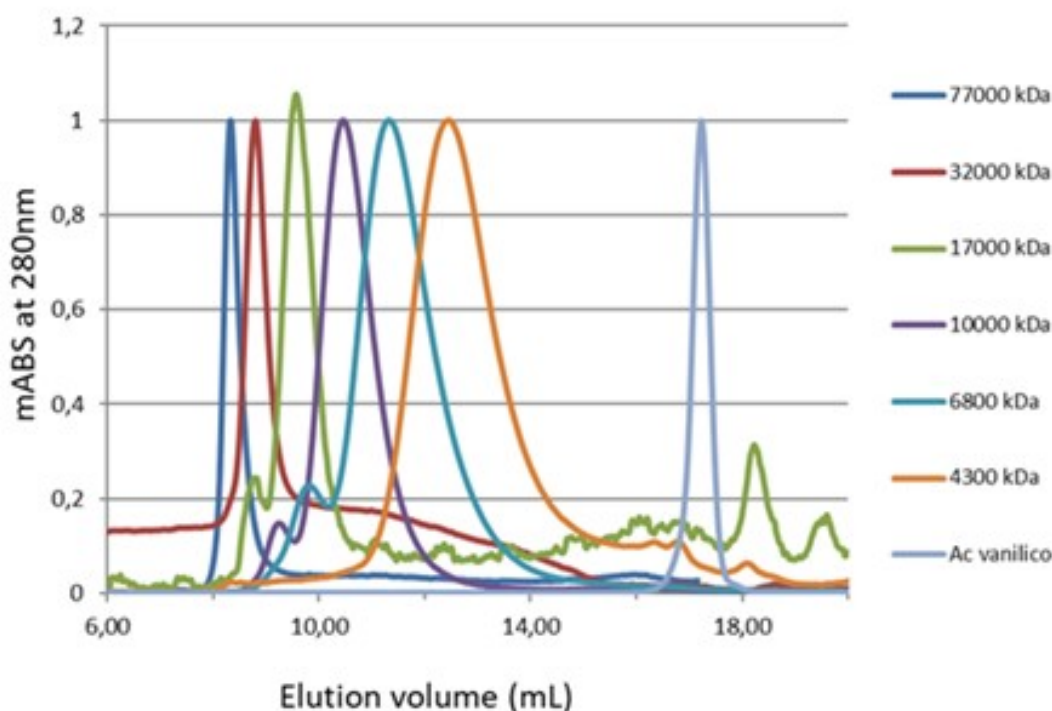

**Figure S1.** Polystyrene sulfonate standard markers used in the calibration column systems for molecular weight range analysis.

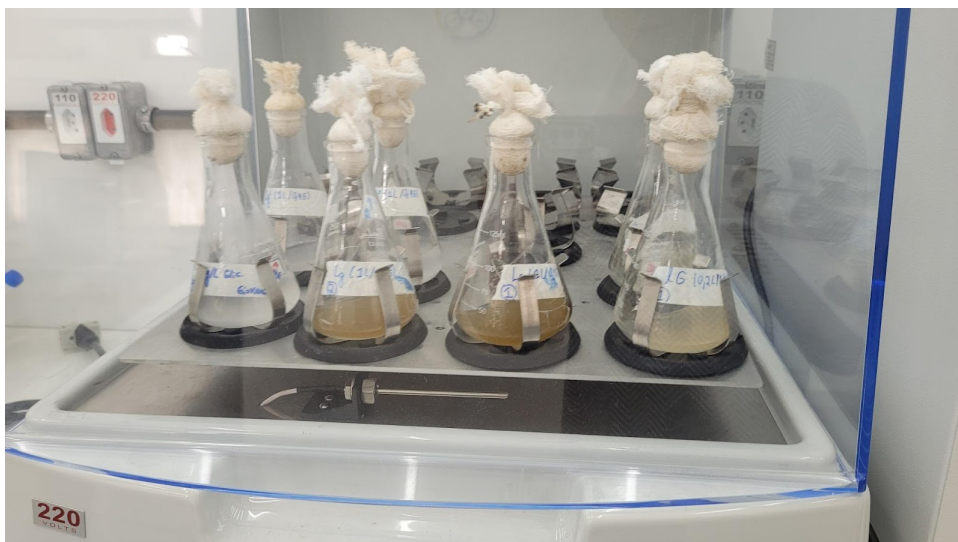

**Figure S2.** (a) Picture of all experiments of DL-assisted *P.putida* growth (48 hours of cultivation).

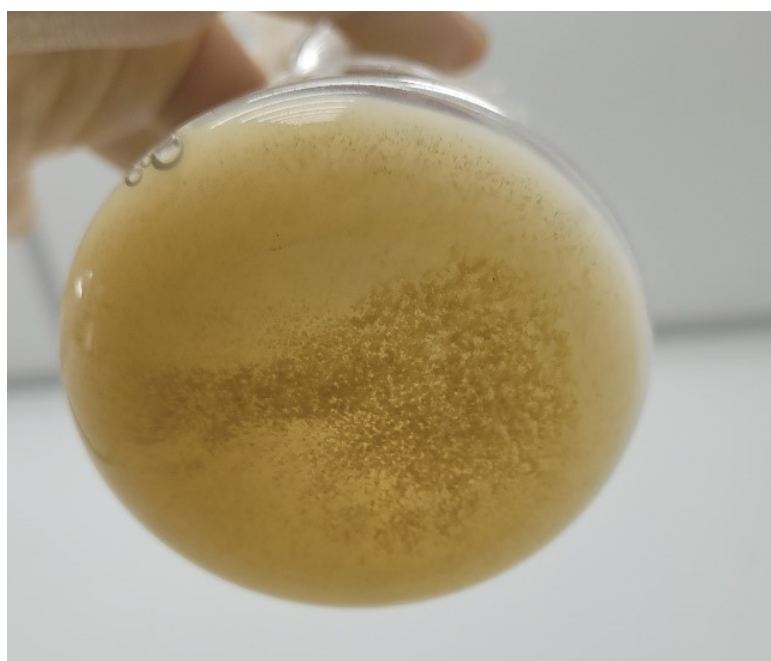

**Figure S2.** (b) Picture of the autoaggregation occurrence in fed-batch conditions of DL-assisted *P.putida* growth. (48 hours of cultivation).

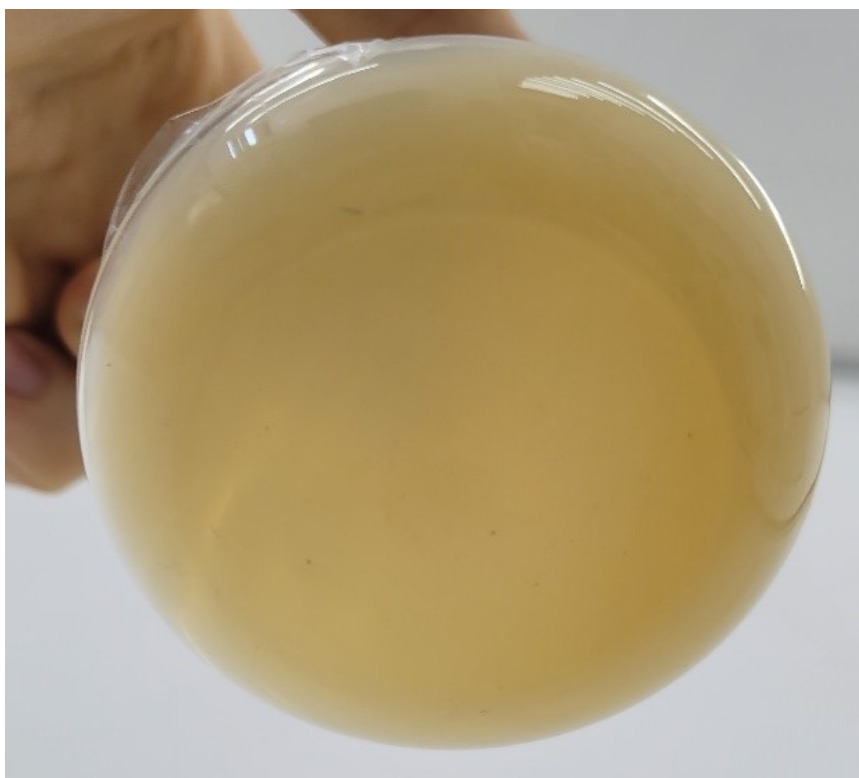

**Figure S2.** (c) Picture of DL-assisted *P.putida* growth that has been introduced to DL initially (48 hours of cultivation).

**Table S1.** The limit of quantification employed for determining the concentrations of the various lignin-derived monomers

| Compounds                       | Limit of Quantification ( $\mu\text{g mL}^{-1}$ ) |
|---------------------------------|---------------------------------------------------|
| Latic Acid                      | 2.5                                               |
| Glycolic acid                   | 4.0                                               |
| Phenol                          | 5.0                                               |
| 2-Hydroxy-2-methylbutanoic acid | 4.0                                               |
| 1,2-Pentanediol                 | 4.0                                               |
| p-Cresol                        | 5.0                                               |
| Benzyl Alcohol                  | 5.0                                               |
| Levulinic acid                  | 7.5                                               |
| Sorbic acid                     | 7.5                                               |
| 4-Ethylphenol                   | 5.0                                               |
| Guaiacol                        | 5.0                                               |

|                              |     |
|------------------------------|-----|
| Benzoic Acid                 | 5.0 |
| Catechol                     | 5.0 |
| 4-Methoxyphenol              | 7.5 |
| 2-Methoxy-4-methylphenol     | 7.5 |
| 4-Methylcatechol             | 5.0 |
| Hydroquinone                 | 5.0 |
| 4-Ethylguaicol               | 5.0 |
| 4-Hydroxybenzaldehyde        | 7.5 |
| 2,6-Dimethoxyphenol          | 5.0 |
| 2,5-Dimethylresorcinol       | 5.0 |
| 3-Methoxy-Catechol           | 5.0 |
| Pyrogallol                   | 5.0 |
| Eugenol                      | 7.5 |
| 4-hydroxyacetophenone        | 7.5 |
| 4-Methyl-2,6 Dimethoxyphenol | 7.5 |
| Trans-cinnamic acid          | 7.5 |
| 4-Hydroxybenzoic acid        | 5.0 |
| Vanillin                     | 7.5 |
| Vanillyl Alcohol             | 7.5 |
| Homovanillyl Alcohol         | 5.0 |
| Vanillic Acid                | 7.5 |
| Syringaldehyde               | 7.5 |
| Acetosyringone               | 7.5 |
| p-coumaric acid              | 7.5 |
| Ferulic acid                 | 7.5 |
